# Supplementary material
Source: PubMed Central journal article supplement (PMC3326181)
Supplement: NIHMS345315-supplement-supplement_1.pdf [file NIHMS345315-supplement-supplement_1.pdf]

## Supplemental Material

### Gene Expression Differences after Rituximab Treatment.

Skin biopsies were first analyzed from dSSc patients before and after treatment with rituximab. Consistent with the clinical findings (Lafyatis *et al.*, 2009), we did not find a significant gene expression response in skin to rituximab treatment. Instead, gene expression was nearly identical between serial biopsies of patients before and after treatment.

RNA was isolated from skin biopsies of 13 patients enrolled in the rituximab study and hybridized to whole-genome DNA microarrays. Lesional forearm samples were analyzed from 10 patients before treatment (base) and six months after rituximab treatment. Non-lesional back skin biopsies were analyzed for 4 of the 10 patients at base and six months. Patient 7 provided forearm and back biopsies eight months before rituximab therapy (pre-base). Patient 17 provided an additional forearm biopsy at twenty months after therapy. Patient 10 provided a forearm biopsy at thirty months after therapy. A total of 49 arrays were analyzed for the rituximab dataset, including 12 technical replicates.

Significance Analysis of Microarrays (SAM) was used to identify differences in gene expression before and after rituximab treatment (Tusher *et al.*, 2001). Two different comparisons were performed. One analysis compared the gene expression of base and six-month time points in forearm biopsies alone. Only 17 probes were significantly differentially expressed at a false discovery rate (FDR) 4.6% (**Supplemental Data File S1**). Inclusion of the non-lesional back samples in the above analysis resulted in 16 probes significantly differentially expressed at an FDR 5.87%.

As a second approach, we selected probes with the most consistent expression at a single time point (such as base) for each patient but the most diverse expression between time points. This analysis identified genes/probes that most varied after treatment. We refer to this as an ‘Intrinsic by Time Point’ analysis, as all samples at a single time point for a patient were

considered an independent group. This is distinct from an ‘Intrinsic by Patient Analysis’ (Milano *et al.*, 2008; Perou *et al.*, 2000; Sorlie *et al.*, 2001), where all samples from a given patient are considered an independent group, regardless of the time point of biopsy collection. 1255 probes were selected with intrinsic scores  $< 0.35$  (FDR 2.5%), and were hierarchically clustered by gene and by array. Despite selecting specifically for probes with expression most variable between time points, arrays for 6 months and base for each patient grouped together (**Supplemental Figure S2A**). In addition, skin biopsies taken at 14, 20 and 24 months from patients 7, 10, and 17, respectively, also grouped with the base and 6-month samples. This demonstrates consistent gene-expression for up to 2 years after the initial biopsy in patients treated with rituximab.

Finally, we asked if we could identify gene expression changes that correlated with the decrease in the numbers of B cells present in the skin of patients treated with rituximab, as determined by immunohistochemistry (IHC). Probes were selected with the strongest correlation between decreased gene expression and CD20+ B cell depletion in the skin after rituximab treatment. A total of 119 probes were selected with correlations  $> 0.50$ . The 119 probes generally show low expression levels (**Supplemental Figure 2B; Supplemental Data File S2**). There is a weak enrichment for genes typically associated with B-cells such as LCP1 which is a membrane expressed protein restricted to hematopoietic stem cell lineages (Samstag and Klemke, 2007) and TNFRSF8 (CD30) expressed only on mitogen-activated B cells and T cells (Falini *et al.*, 1995).

These results show few gene expression differences were found in SSc skin after rituximab treatment. This is consistent with the observation that the mean change in MRSS for rituximab treated patients was not significantly different between baseline (20.6) and 6-months (20.2). The most important observation from this analysis is the similarity of gene expression from 6 months to 2 years, in dSSc patients with early and active disease.

### Concordance in biological pathways.

The module map was generated using GO Biological Process and Molecular Function gene sets, as well as gene sets representing cell cycle-regulated genes (Whitfield *et al.*, 2002) (**Supplemental Figure S3**). Modules with increased expression are shown in red; those with decreased expression are shown in green ( $p \leq 0.05$ , FDR correction 0.1). Modules were clustered in the gene dimension by similarity of expression, and arrays were ordered as in the by patient analysis presented in **Figure 2**.

Patients in the inflammatory group show coordinate increased expression of genes involved in inflammatory response, angiogenesis, antigen processing, and chemokine receptor activity. The diffuse 2 proliferation group shows increased expression of cell cycle-related gene sets including those for S, G2, and G2/M phases of the cell cycle. The diffuse 1 proliferation group shows a weak increase in proliferation related signatures. The normal-like group and diffuse 1 proliferation group show increased expression of genes associated with lipid metabolism and fatty acid metabolism. The module map with all GO biological processes is available in **Supplemental Figure S4**.

The skin is comprised of many different cell types, and the inflammatory signature in part results from infiltrating mononuclear cells (Milano *et al.*, 2008), thus additional gene sets for specific cell types were collected from the published literature and used with Genomica analysis. We collected genes sets for B cells, T cells, and granulocytes (Palmer *et al.*, 2006), as well as gene sets for isolated fibroblasts, keratinocytes, macrophages, monocytes, and immature and mature dendritic cells (Haider *et al.*, 2008). Haider *et al.* also identified genes upregulated after keratinocytes were treated with interferon-gamma (INF- $\gamma$ ) and with tumor necrosis factor (TNF), and characterized gene expression changes in anti-CD3/CD28 treated T cells and PBMCs. In addition they created gene sets for upregulated genes in combined groups of cells, including myeloid cells (DC, macrophages, monocytes), skin resident cells (fibroblasts and keratinocytes), and leukocytes (monocytes, macrophages, DCs, and T cells).

Genomic analysis using these cell type-specific gene sets ( $p \leq 0.05$ , FDR 0.1) shows highest coordinate increased expression associated with fibroblasts, keratinocytes, activated keratinocytes and fibroblasts, activated PBMCs, and other infiltrating circulating cells in the inflammatory group (**Supplemental Figure S3B**). Also apparent is the coordinate increased expression of genes associated with activated monocytes, T cells and genes with peak expression at G1/S, G2, G2/M, and S phase. There was coordinate upregulation for myeloid cells and mature and immature dendritic cells (DCs) for SSc patients compared to healthy controls.

## **Supplemental Materials and Methods.**

### **Patient biopsies**

A total of 60 skin biopsies were collected from 22 patients with dSSc and 9 healthy controls. Each biopsy was placed in RNAlater (Ambion) and stored at -20 until processed. Lesional forearm samples were analyzed from ten patients enrolled in the rituximab study before treatment (base) and six months after rituximab treatment. One individual (Patient 7) provided forearm and back biopsies eight months before rituximab therapy (pre-base). Another (Patient 17) provided an additional forearm biopsy at 20 months after therapy. A third (Patient 10) provided a forearm biopsy at 30 months after therapy. Two patients who were not treated with rituximab were biopsied at 10 and 6 months after baseline (Non-RIT1 and Non-RIT2 respectively).

### **RNA and Microarray Processing**

The Agilent low input fluorescent linear amplification kit was used to fluorescently label and amplify 100ng total RNA for hybridization. Subject RNA was labeled with Cy3 dye, and Universal Human Reference RNA (UHR) (Stratagene) was labeled with fluorescent Cy5 dye. After amplification and labeling, the cRNA was purified using the Qiagen RNeasy mini spin columns and procedure. Patient or normal-control RNA was co-hybridized with UHR RNA to 4-



plex 44K Agilent 60-mer whole human genome microarrays, representing 41,000 unique probes.

The hybridization was carried out for 17 hours at 65°C.

Arrays were washed using the two-color microarray-based gene expression analysis protocol for use with the Agilent Stabilization and Drying Solution (6X SSPE, 0.005% N-Lauroylsarcosine for 1 minute at room temperature; 0.06X SSPE, 0.005% N-Lauroylsarcosine for 1 minute at 37°C; Acetonitrile wash for 1 minute at room temperature; Stabilization and Drying Solution for 30 seconds at room temperature). A total of 89 arrays were hybridized, which included 29 technical replicates.

A dual laser GenePix 4000B scanner (Axon Instruments) was used to scan the arrays. Gene Pix Pro 5.0 software was used to inspect arrays, and spots showing irregularities were manually flagged and excluded. The data was Log<sub>2</sub> LOWESS normalized for the Cy5/Cy3 ratio. The data was filtered to select array spots with an intensity 2 fold or greater than the local background in either the Cy3 or Cy5 channel. Any probes missing more than 20% of the data across all arrays were also omitted from further analysis.

### **Intrinsic gene analysis**

Intrinsic gene analysis is essentially a ‘within-between’ comparison of the gene expression of individual probes. The method is used to identify probes with gene expression most similar within each group of arrays (arrays grouped either ‘by patient time point’ or ‘by patient’), but gene expression most variable between groups of arrays. Filtering probes in this way reduces the variability between arrays, in order to better compare the gene expression between groups and/or patients. For the gene expression of each probe, the algorithm calculated the ratio of the variability within each group of arrays, divided by the variability between each group of arrays. The weighted average of the variance of each group of arrays formed the value of the numerator (A). The weighted average of the gene expression for arrays in each group was calculated and the variance of the average gene expression across all groups of arrays formed the

denominator (B). As a result, the smaller the expression variance within each individual group of arrays, and the larger the expression variance between groups, the smaller the “intrinsic score” calculated for each probe.

To determine an FDR value, the gene expression data was permuted 20 times, and the intrinsic gene algorithm was used with each of the permuted gene expression datasets. The average number of probes that were less than a given intrinsic score cutoff in the permuted data was divided by the number of probes that obtained the intrinsic score cutoff in the non-permuted data. This value was multiplied by 100 to provide a percentage FDR rate.

### **DAVID Analysis**

The Database for Annotation, Visualization, and Integrated Discovery tool (DAVID) (Huang *et al.*, 2007) was used to analyze the enrichment of GO biological processes associated with the list of genes in each of the intrinsic ‘by patient’ inflammatory, proliferation, and fatty-acid gene expression subsets. The GO-term pathway results with a Benjamini-hochberg corrected p-value  $\leq 0.1$  are listed in **Supplementary Data File S3**.

### **Hierarchical clustering**

Using cluster 3.0 software, the gene expression data was average linkage hierarchically clustered in the array and gene dimension (<http://bonsai.ims.u-tokyo.ac.jp/~mdehoon/software/cluster/software.htm>). The gene expression data was viewed using Java Tree View (<http://jtreeview.sourceforge.net/>).

### **Module maps**

Module maps were created utilizing Genomica software. The gene sets used within Genomica included the GO biological pathway, process, and function gene sets, as well as gene sets comprised of genes expressed coordinately during various phases of the cell cycle from a study

by Whitfield et al. (Whitfield *et al.*, 2002). Additional gene sets included those for B-cells, T-cells, and granulocytes from Palmer et al. (Palmer, Diehn et al. 2006) as well as those by Haider et al. (Haider, Lowes et al. 2008) who defined a number of unique sets of genes for various cell types, used here to create gene sets for Genomica analysis. Haider et al. collected a series of microarray experiments that detected up-regulation of gene expression for isolated fibroblasts, keratinocytes, macrophages, monocytes, and immature and mature dendritic cells. They created also gene lists from genes upregulated after keratinocytes were treated with interferon-gamma (INF- $\gamma$ ) and with tumor necrosis factor (TNF). They also characterized gene expression changes in CD3/CD28 activated T cells and PBMCs. In addition they formed lists of genes showing up regulation in expression associated with overlapping groups of cells, including myeloid cells (DC, macrophages, monocytes) as well as skin resident cells (fibroblasts and keratinocytes), and leukocytes (monocytes, macrophages, DCs, and T cells).

### **Immunohistochemistry**

Formalin fixed, paraffin embedded sections were rehydrated and either treated for antigen retrieval (COMP, 8 minutes in pressure cooker in 1X CitraPlus, Biogenex) or stained without antigen retrieval (IFITM3). Sections were then treated for 45 minutes with 0.3% peroxide, blocked in 3% BSA for 30 minutes and incubated with primary antibody to IFITM3 (rabbit anti-human IFITM3, Epitomics, clone EPR5242) 1:250 dilution, or COMP (rabbit anti-human COMP, Epitomics polyclonal, cat# T1833) 1:100 dilution at 4 °C overnight, these reagents all diluted into 1X Tris buffered saline (pH 7.4, Fisher) supplemented with 0.1% Tween20. The following day secondary reagent was applied (ImmPRESS Universal Reagent, Anti-mouse/rabbit Ig, Peroxidase, Vector Laboratories), developed (ImmPACT DAB, Vector) and counterstained with Hematoxylin. Staining was scored by a blinded observer on a 0-100 point visual analog scale as described previously (Farina *et al.*)

**Supplemental Table 1. Skin Biopsies Analyzed**

| Subject        | Base | 6 Months | Additional Biopsy    | Notes                             |
|----------------|------|----------|----------------------|-----------------------------------|
| RIT 2          |      | X        |                      | Back sample only                  |
| RIT 3          | X    | X        |                      |                                   |
| RIT 5          | X    | X        |                      |                                   |
| RIT 6          | X    | X        |                      |                                   |
| RIT 7          | X    | X        | 8 months before base | No back sample for base biopsy    |
| RIT 8          | X    | X        |                      | No forearm sample for base biopsy |
| RIT 10         |      | X        | 30 months after base | Forearm only                      |
| RIT 11         | X    | X        |                      |                                   |
| RIT 12         | X    | X        |                      | Forearm only                      |
| RIT 13         | X    | X        |                      | Forearm only                      |
| RIT 14         | X    | X        |                      | Forearm only                      |
| RIT 15         | X    | X        |                      | Forearm only                      |
| RIT 17         | X    | X        | 20 months after base | Forearm only                      |
| dSSc non RIT 1 | X    |          | 10 months later      | Forearm only                      |
| dSSc non RIT 2 | X    | X        |                      | Forearm only                      |
| dSSc non RIT 3 | X    |          |                      |                                   |
| dSSc non RIT 4 | X    |          |                      |                                   |
| dSSc non RIT 5 | X    |          |                      | Forearm only                      |
| dSSc non RIT 6 | X    |          |                      | Forearm only                      |
| dSSc non RIT 7 | X    |          |                      | Forearm only                      |
| dSSc non RIT 8 | X    |          |                      | Forearm only                      |
| dSSc non RIT 9 | X    |          |                      | Forearm only                      |
| Normal 1       | X    |          |                      | Forearm only                      |
| Normal 2       | X    |          |                      | Forearm only                      |
| Normal 3       | X    |          |                      | Forearm only                      |
| Normal 4       | X    |          |                      | Forearm only                      |
| Normal 5       | X    |          |                      | Forearm only                      |
| Normal 6       | X    |          |                      | Forearm only                      |
| Normal 7       | X    |          |                      | Forearm only                      |
| Normal 8       | X    |          |                      | Forearm only                      |
| Normal 9       | X    |          |                      | Forearm only                      |

Skin biopsy samples, indicating if samples were collected at base, 6 months later, if only forearm (lesional) skin was collected, and if any additional samples were collected.

Supplemental Table S2: Subject Clinical Characteristics

| Subject | Age <sup>1</sup> / Sex | Biopsy Interval | Disease Duration (months) | MRSS | FVC | DLCO | Autoantibodies Scl-70 /RNApoIII/CENPB | Intrinsic Subset Assignment <sup>2</sup> | Medications                        |
|---------|------------------------|-----------------|---------------------------|------|-----|------|---------------------------------------|------------------------------------------|------------------------------------|
| RIT 2   | 54/F                   | base            | 18                        | 27.5 | 62  | 61   | + / - / -                             | Unclassified                             |                                    |
|         |                        | 6 months        | 24                        | 28   | 85  | 72   |                                       |                                          | PREDNISON 5 MG, RITUXIMAB          |
| RIT 3   | 42/F                   | base            | 18                        | 13   | 72  | 55   | + / - / -                             | Unclassified                             |                                    |
|         |                        | 6 months        | 24                        | 13   | 76  | 56   |                                       |                                          | RITUXIMAB                          |
| RIT 5   | 32/F                   | base            | 18                        | 19   | 108 | 80   | - / - / -                             | Diffuse 2                                | PLAQUENIL                          |
|         |                        | 6 months        | 24                        | 23   | 108 | 74   |                                       |                                          | PLAQUENIL RITUXIMAB                |
| RIT 6   | 49/F                   | base            | 15                        | 27.5 | 117 | 98   | - / - / -                             | Diffuse 2                                | PREDNISON 5 MG                     |
|         |                        | 6 months        | 21                        | 25   | 112 | 87   |                                       |                                          | RITUXIMAB                          |
| RIT 7   | 46/F                   | pre base        | 7                         | 19   |     |      | - / - / -                             | Diffuse 2                                |                                    |
|         |                        | base            | 15                        | 19   | 86  | 85   | - / + / -                             | Diffuse 2                                | METHOTREXATE, PREDNISON 5 MG       |
|         |                        | 6 months        | 21                        | 15   | 100 | 86   |                                       |                                          | METHOTREXATE, PREDNISON, RITUXIMAB |
| RIT 8   | 53/F                   | base            | 18                        | 31   | 94  | 81   | - / + / -                             | Inflammatory                             |                                    |
|         |                        | 6 months        | 24                        | 45.5 | 93  | 76   |                                       |                                          | RITUXIMAB                          |
| RIT 10  | 38/F                   | base            | 12                        | 10   | 83  | 107  | - / - / -                             | Inflammatory                             | PLAQUENIL, PREDNISON 5 MG          |
|         |                        | 6 months        | 18                        | 7    | 101 | 85   |                                       |                                          | PLAQUENIL PREDNISON RITUXIMAB      |
|         |                        | 36 months       | 42                        | 20   | 92  | 74   |                                       |                                          | Bosentan, Avapro                   |
| RIT 11  | 36/M                   | base            | 15                        | 29   | 64  | 78   | - / - / -                             | Diffuse 1                                | PREDNISON 5 MG,                    |
|         |                        | 6 months        | 21                        | 29   | 53  | 69   |                                       |                                          | PREDNISON, RITUXIMAB               |
| RIT 12  | 33/F                   | base            | 18                        | 15   | 105 | 67   | + / - / -                             | Diffuse 1                                |                                    |
|         |                        | 6 months        | 24                        | 15   | 105 | 95   |                                       |                                          | RITUXIMAB                          |
| RIT 13  | 56/F                   | base            | 11                        | 13   | 119 | 81   | - / + / -                             | Inflammatory                             |                                    |
|         |                        | 6 months        | 17                        | 17   | 100 | 84   |                                       |                                          | RITUXIMAB                          |
| RIT 14  | 43/F                   | base            | 9                         | 9    | 76  | 66   | - / - / +                             | Unclassified                             |                                    |
|         |                        | 6 months        | 15                        | 5    | 71  | 52   |                                       |                                          | RITUXIMAB                          |
| RIT 15  | 44/F                   | base            | 7                         | 20   | 102 | 94   | - / - / -                             | Inflammatory                             |                                    |
|         |                        | 6 months        | 13                        | 24   | 120 | 94   |                                       |                                          | RITUXIMAB                          |
| RIT 17  | 57/M                   | base            | 11                        | 30   | 78  | 78   | - / - / -                             | Diffuse 1                                |                                    |
|         |                        | 6 months        | 18                        | 25   | 92  | 87   |                                       |                                          | RITUXIMAB                          |
|         |                        | 25 months       | 31                        | 17   | 85  | 82   |                                       |                                          |                                    |
| dSSc_3  | 65/F                   | base            | 12                        | 30   | 66  | 55   | - / ND / ND                           | Inflammatory                             | METHREXATE                         |
| dSSc_4  | 54/M                   | base            | 26                        | 40   | 47  | 30   | ND                                    | Diffuse 1                                | CYCLOPHOSPHAMIDE                   |
| dSSc_5  | 30/F                   | base            | 60                        | 24   |     |      | ND                                    | Normal-like                              | PREDNISON 5 MG                     |
| dSSc_6  | 53/F                   | base            | 48                        | 14   | 104 | 102  | ND                                    | Inflammatory                             | MYCOPHENOLATE                      |
| dSSc_1  | 42/M                   | base            | 18                        | 40   | 108 | 92   | - / ND / ND                           | Inflammatory                             | NO                                 |
|         |                        | 10 months       | 28                        | 48   | 103 | 82   |                                       |                                          | CYCLOPHOSPHAMIDE                   |
| dSSc_2  | 49/F                   | base            | 13                        | 37   | 92  | 65   | ND                                    | Inflammatory                             | PREDNISON 5 mg,                    |
|         |                        | 6 months        | 19                        | 35   | 95  | 65   |                                       |                                          |                                    |
| dSSc_7  | 54/F                   | base            | 9                         | 14   | 79  | 65   | ND                                    | Normal-like                              | MYCOPHENOLATE                      |
| dSSc_8  | 44/F                   | base            |                           | 36   | 113 | 74   | - / ND / ND                           | Inflammatory                             | PREDNISON 5 mg MYCOPHENOLATE       |
| dSSc_9  | 41/M                   | base            | 14                        | 23   | 60  | 49   | - / ND / ND                           | Diffuse 1                                | PREDNISON 5 MG                     |

<sup>1</sup>Age at first biopsy<sup>2</sup>This study

Figure S1

\*  $P < .05$ 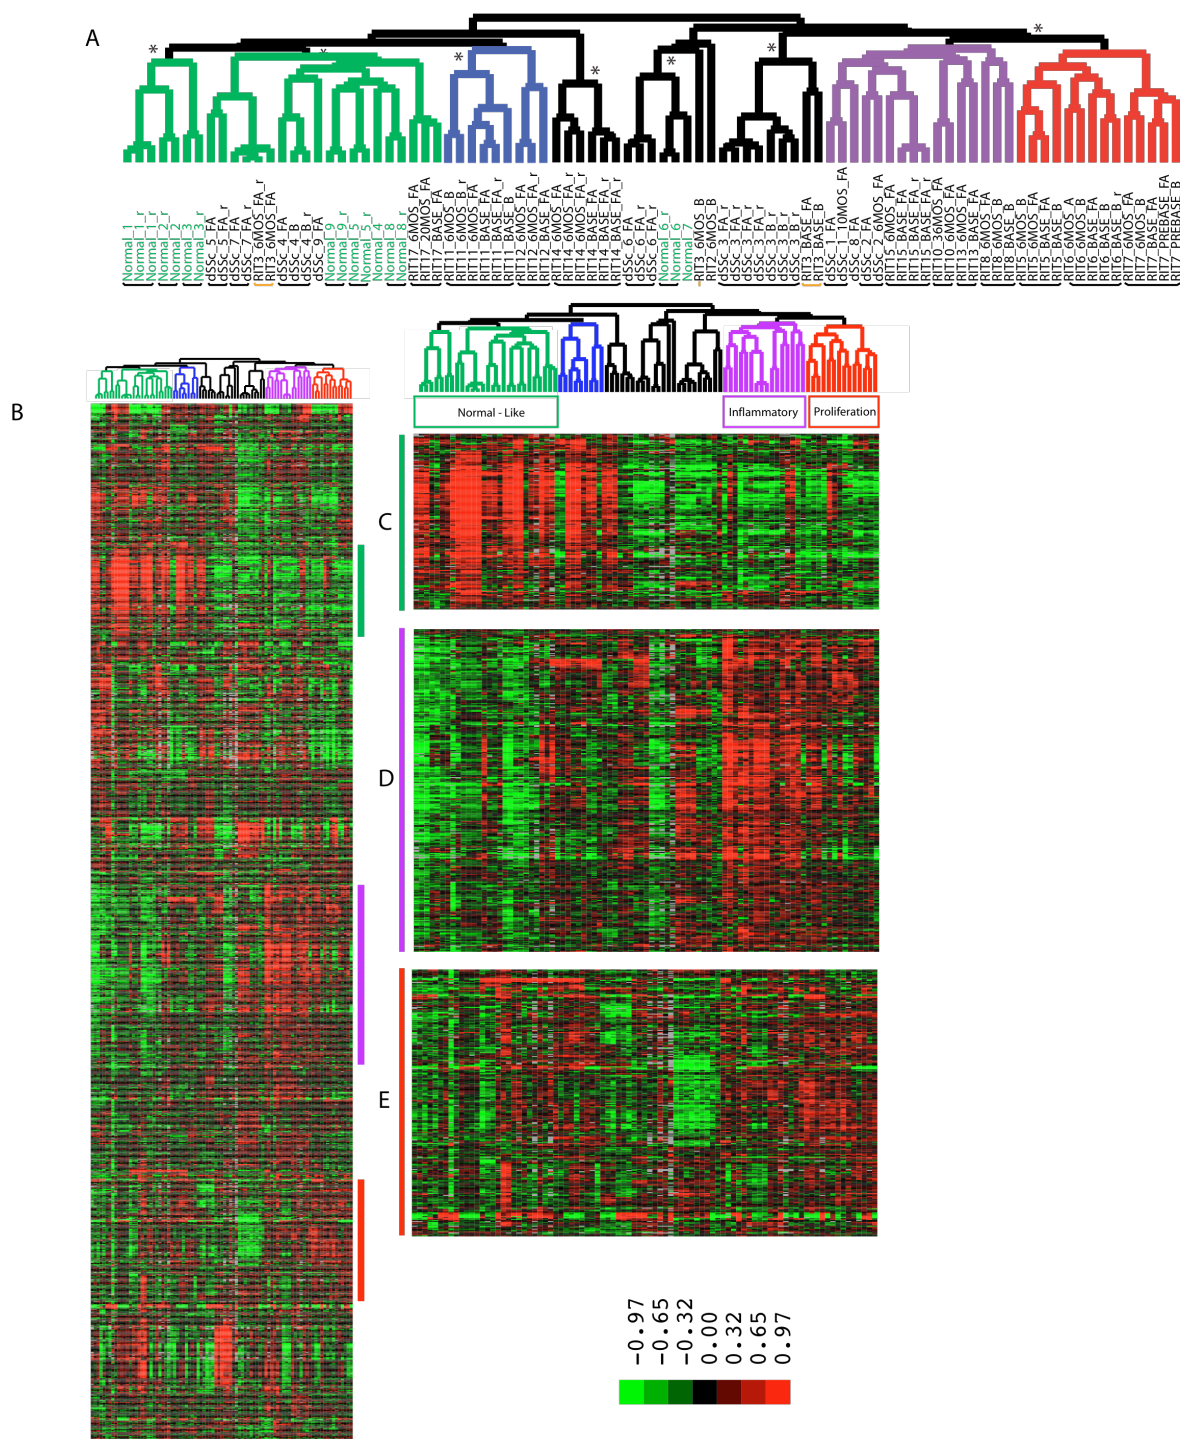

**Supplemental Figure S1. ‘Intrinsic-by-time-point’ analysis shows consistent gene expression between time points. A and B show the results of intrinsic “by patient date” analysis, a resultant 1888 probes with an intrinsic score less than 0.45 (FDR 1.58%) selected**

from 89 arrays and a total of 31 individuals. A. Experimental sample hierarchical clustering dendrogram. Dendrogram branches in green are the '*normal-like*' group, branches in blue (*diffuse 1*) and red (*diffuse 2*) are the '*diffuse-proliferation*' group, and branches in purple are the '*inflammatory*' group. The statistical significance of the clustering was determined by SigClust. Branches that were significant  $p \leq 0.05$  are indicated by a black asterisk (\*) at the lowest significant branch. Patient identifiers below the dendrogram marked in green are from normal healthy control skin biopsies, identifiers in black are from dSSc skin biopsies. Identifiers with "RIT" are samples from the rituximab study, those with "dSSc" are from diffuse SSc patients not in the rituximab study, and identifiers with "normal" indicate a healthy control skin biopsy. Black bars below the identifiers indicate arrays from skin biopsies from the same patient that clustered together. The yellow bars identify arrays for patient RIT 3 that were not in a single cluster. B. Heat map of the 1888 probes hierarchically clustered by gene and by array. C. The Fatty-Acid synthesis related gene expression cluster. D. The group of probes with upregulated expression associated with inflammatory processes and collagen genes. E. The group of probes that shows enrichment for genes involved in cell cycle and proliferating cells.

## Supplemental

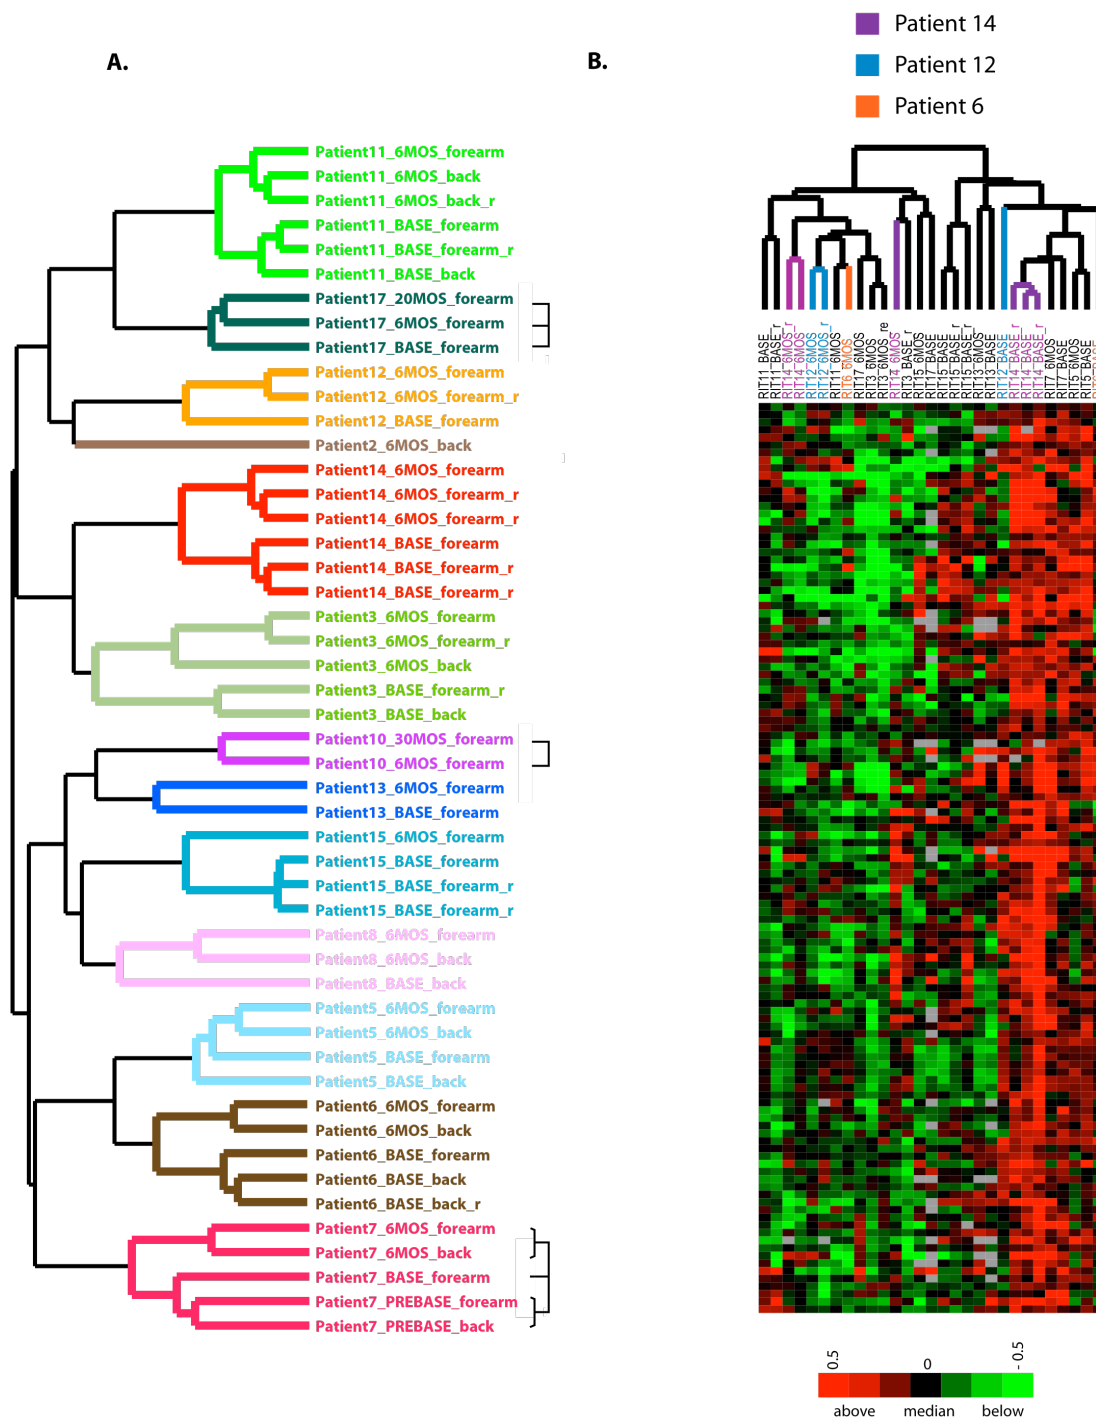

**Supplemental Figure S2. Consistency of gene expression after Rituximab treatment. A.**

The clustering of the group of 1255 probes after intrinsic analysis with samples separated into groups by time point. For each patient, dendrogram branches and sample identifiers are marked



with the same color. Black bars indicate patients with additional skin biopsies beyond base and 6-month samples that clustered with the other arrays. The figure shows consistent clustering between six month and base skin biopsies. Patient 7 (red) had skin biopsies taken eight months before the base sample (prebase), and those biopsies group with the later time point biopsies. Patient10 (purple) had a skin biopsy taken 24 months after the six-month sample, and that array clusters with the 6-month sample. Patient 17 (dark green) had a skin biopsy taken 20 months after the base sample, and again, that array clusters with the earlier time points. This indicates a consistency of gene expression across time points. B. The clustering of the top 119 probes with a positive correlation  $> 0.5$  between gene expression change in forearm skin biopsies and the change in infiltrating CD20+ B-cell number. Patients 14, 12, and 6 (dendrogram branches in purple, blue, and orange respectively) showed weak trends in down regulation of gene expression for the 119 probes between base and 6 months. While patient 14 and patient 6 showed small decreases in skin score, changing from 9 to 5, and 27.5 to 25, respectively, between base and 6 months, patient 12 showed no change in skin score between base and 6 months. In addition, patients 7 and 17 had decreases in skin score between six months and base, and those skin biopsies did not show a change in gene expression between the two time points.

A

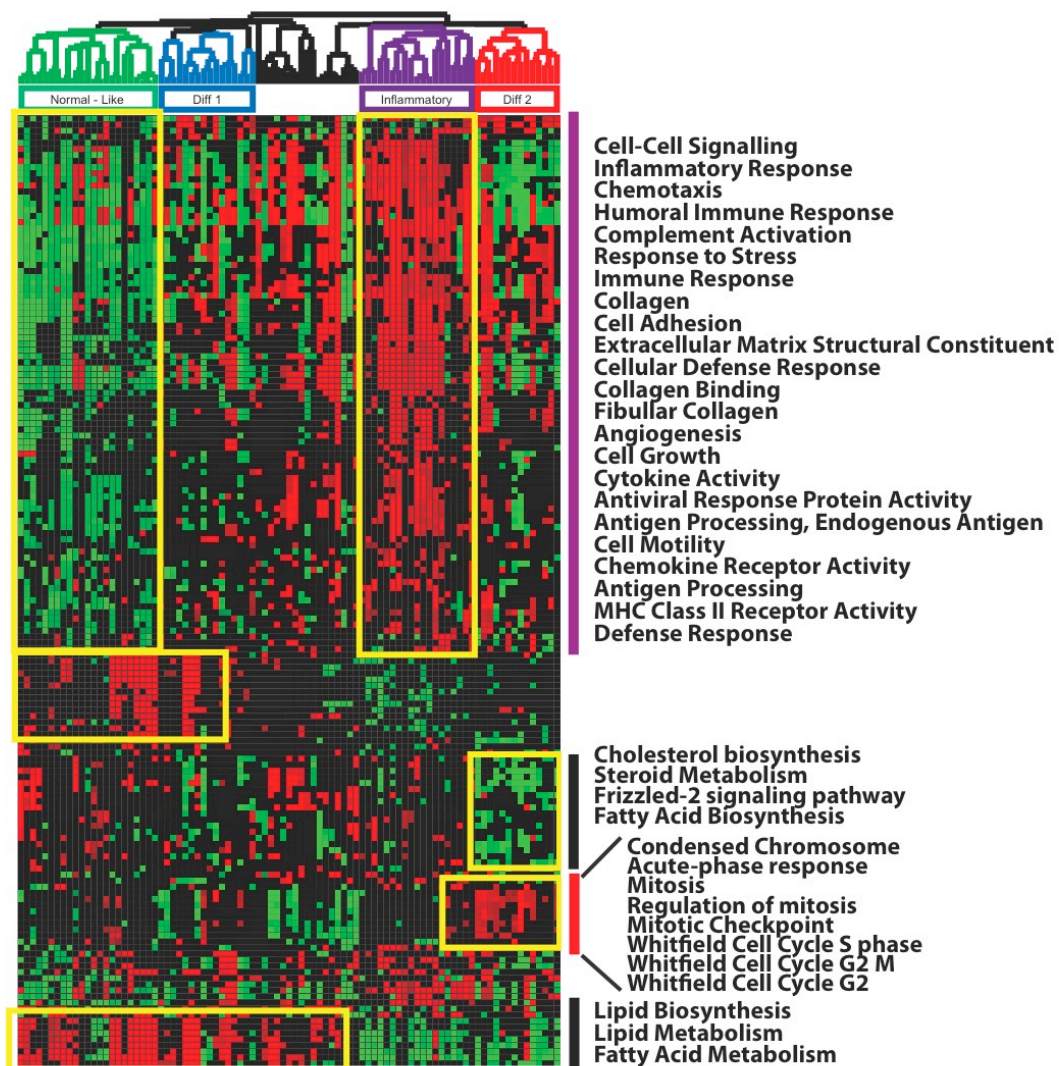

B

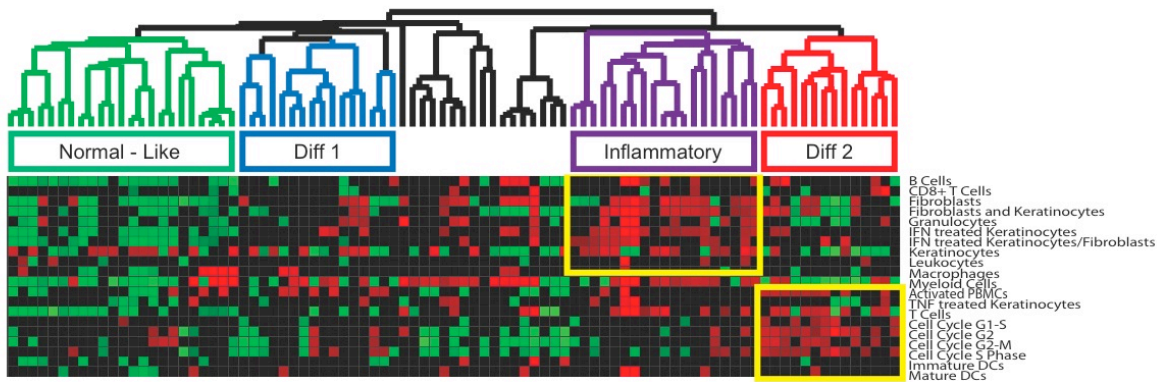

**Supplemental Figure S3. Coordinate expression of proliferative, inflammatory, and fatty acid processes.** **A.** The module map representing coordinately regulated genes that correspond to GO biological pathway, process, and function gene sets as well as gene sets expressed coordinately during various phases of the cell cycle. Modules with a significant coordinate increased expression are shown in red; those with decreased expression are shown in green ( $p \leq 0.05$ , FDR correction 0.1). **B.** Module map using gene lists from up-regulated gene expression unique to B cells, T cells, granulocytes, fibroblasts, keratinocytes, macrophages, immature and mature dendritic cells, as well as overlapping groups of cells, including myeloid cells (DC, macrophages, monocytes) as well as skin resident cells (fibroblasts and keratinocytes), and leukocytes (monocytes, macrophages, DCs, and T cells). Also included are pathway related gene lists from microarray analysis of Fibroblasts and Keratinocytes treated with interferon-gamma (INF- $\gamma$ ) or tumor necrosis factor (TNF), as well as gene lists from anti-CD3/CD28 activated PBMCs and T cells.



**Supplemental Figure S4. Genomica module map with all GO pathways identified.** The resultant module map representing coordinately regulated genes that correspond to gene sets. Modules with a significant coordinate increased expression are shown in red; those with decreased expression are shown in green ( $p \leq 0.05$ , FDR correction 0.1). This figure is best viewed in PDF format.

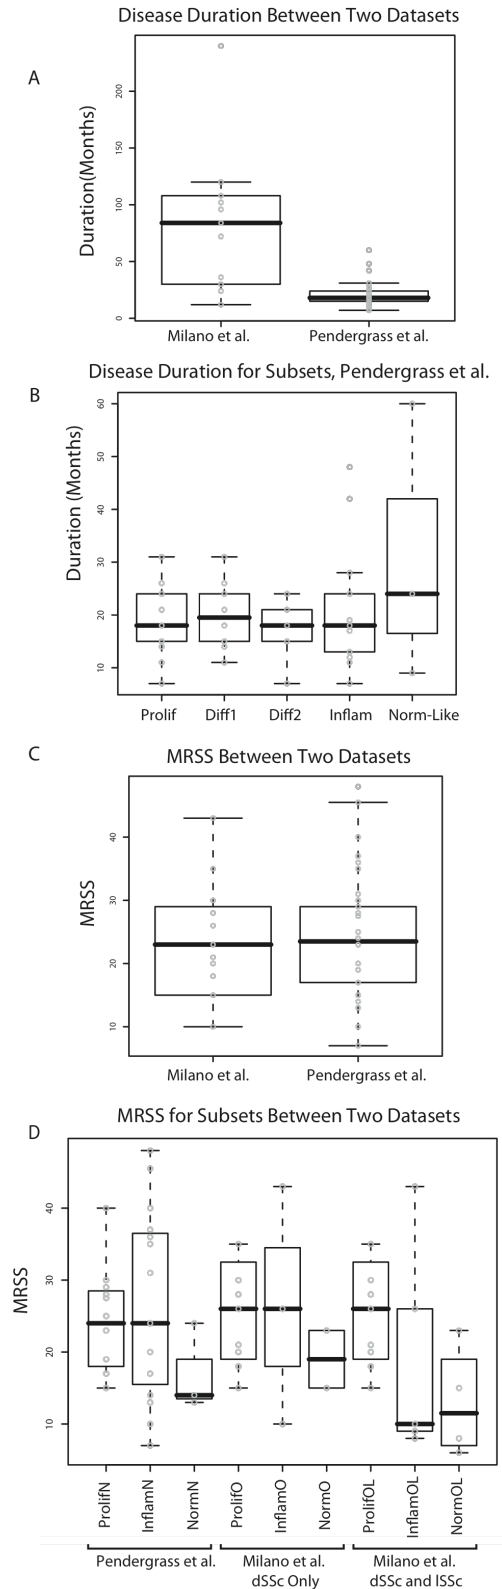

**Supplemental Figure S5. Disease duration different between the two datasets.** **A.** Shows the range of disease duration (in months) between the first and second dataset. **B.** Similarity in median patient disease duration between the ‘intrinsic by patient’ subsets. Although the normal-like group appears to have longer disease duration, the data are skewed by one of three dSSc

patients in this group having a disease duration of 60 months; the opposite trend from what we observed in our previous study (Milano *et al.* 2008). **C.** The range of MRSS skin scores between the first and second dataset. **D.** The range of MRSS for the second dataset split by ‘intrinsic by patient’ subsets (ProlifN, InflanN, NormN), MRSS for the first dataset split by subset when MRSS for limited SSc patients is not included (ProlifO, InflanO, NormO), MRSS for the first dataset when MRSS for limited SSc patients is included (ProlifOL, InflanOL, NormOL).

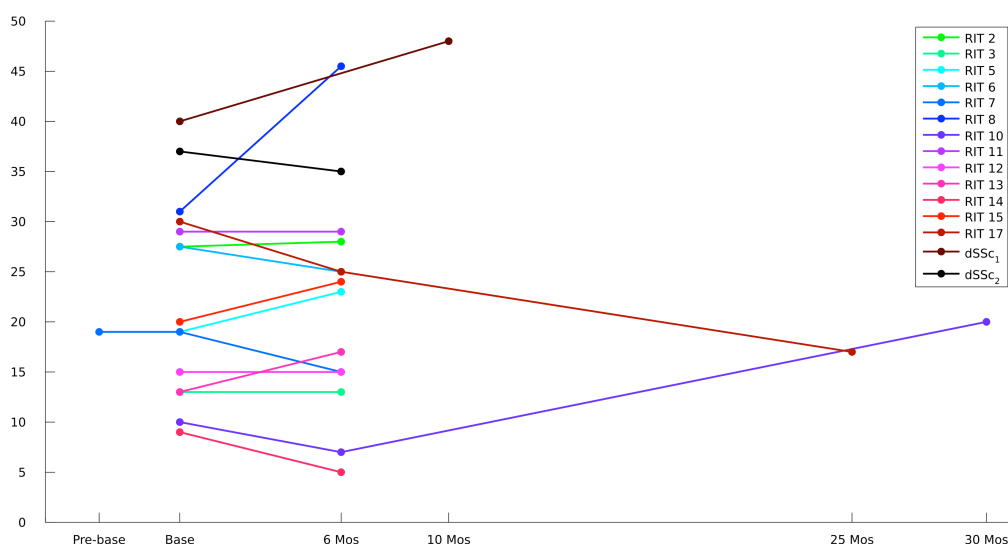

**Supplemental Figure S6. The MRSS at time of biopsy is plotted for each patient.**

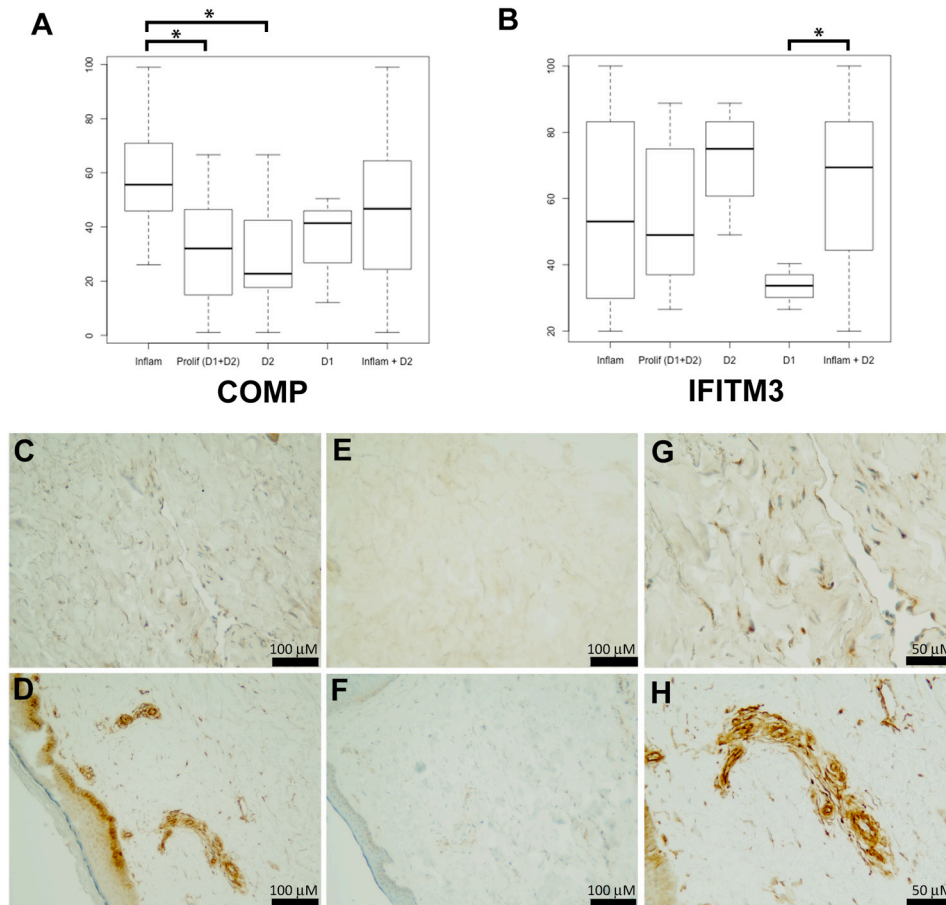

**Supplemental Figure S7. Immunohistochemistry of skin biopsies.** Box plots of the IHC staining results for fifteen skin biopsies spanning the different subsets for COMP (A) which showed highest expression in the inflammatory subset and lowest expression in the proliferation subsets, and eleven biopsies stained for IFITM3 (B) that showed highest expression in the inflammatory and diffuse 2 subset and lowest expression in the diffuse 1 and normal-like groups. Significant differences at  $p < 0.05$  are indicated (\*). A blinded observer scored each biopsy. Representative staining are shown for COMP in SSc (C and G; patient RIT13, 6 month forearm biopsy) and IFITM3 (D and H; patient RIT10, 6 month forearm biopsy). Panels E and F show staining for COMP and IFITM3, respectively in healthy control tissue.



## References

- Falini B, Pileri S, Pizzolo G, Durkop H, Flenghi L, Stirpe F, *et al.* (1995) CD30 (Ki-1) molecule: a new cytokine receptor of the tumor necrosis factor receptor superfamily as a tool for diagnosis and immunotherapy. *Blood* 85:1-14.
- Farina G, Lemaire R, Pancari P, Bayle J, Widom RL, Lafyatis R (2009) Cartilage oligomeric matrix protein expression in systemic sclerosis reveals heterogeneity of dermal fibroblast responses to transforming growth factor beta. *Ann Rheum Dis* 68:435-441.
- Haider AS, Lowes MA, Suarez-Farinas M, Zaba LC, Cardinale I, Blumenberg M, *et al.* (2008) Cellular genomic maps help dissect pathology in human skin disease. *J Invest Dermatol* 128:606-615.
- Huang da W, Sherman BT, Tan Q, Collins JR, Alvord WG, Roayaei J, *et al.* (2007) The DAVID Gene Functional Classification Tool: a novel biological module-centric algorithm to functionally analyze large gene lists. *Genome Biol* 8:R183.
- Lafyatis R, Kissin E, York M, Farina G, Viger K, Fritzler MJ, *et al.* (2009) B cell depletion with rituximab in patients with diffuse cutaneous systemic sclerosis. *Arthritis Rheum* 60:578-583.
- Milano A, Pendergrass SA, Sargent JL, George LK, McCalmont TH, Connolly MK, *et al.* (2008) Molecular subsets in the gene expression signatures of scleroderma skin. *PLoS ONE* 3:e2696.
- Palmer C, Diehn M, Alizadeh AA, Brown PO (2006) Cell-type specific gene expression profiles of leukocytes in human peripheral blood. *BMC Genomics* 7:115.
- Perou CM, Sorlie T, Eisen MB, van de Rijn M, Jeffrey SS, Rees CA, *et al.* (2000) Molecular portraits of human breast tumours. *Nature* 406:747-752.
- Samstag Y, Klemke M (2007) Ectopic expression of L-plastin in human tumor cells: diagnostic and therapeutic implications. *Adv Enzyme Regul* 47:118-126.
- Sorlie T, Perou CM, Tibshirani R, Aas T, Geisler S, Johnsen H, *et al.* (2001) Gene expression patterns of breast carcinomas distinguish tumor subclasses with clinical implications. *Proc Natl Acad Sci U S A* 98:10869-10874.
- Tusher VG, Tibshirani R, Chu G (2001) Significance analysis of microarrays applied to the ionizing radiation response. *Proc Natl Acad Sci U S A* 98:5116-5121.

Whitfield ML, Sherlock G, Saldanha AJ, Murray JI, Ball CA, Alexander KE, *et al.* (2002) Identification of genes periodically expressed in the human cell cycle and their expression in tumors. *Mol Biol Cell* 13:1977-2000.

**Supplementary Data File S1: Top Differentially Regulated SAM analysis, 6 Months vs Base**

| Forearm SAM analysis (FDR < 4.6%)                                                                                              |  |
|--------------------------------------------------------------------------------------------------------------------------------|--|
| 859193 ^ C3 ^ Complement component 3 ^ Hs.529053 ^ NM_000064 ^ 718                                                             |  |
| 697000 ^ OLFM1 ^ Olfactomedin 1 ^ Hs.522484 ^ NM_006334 ^ 10439                                                                |  |
| 857676 ^ ETS2 ^ V-ets erythroblastosis virus E26 oncogene homolog 2 (avian) ^ Hs.517296 ^ NM_005239 ^ 2114                     |  |
| 866997 ^ GTF2E2 ^ General transcription factor IIE, polypeptide 2, beta 34kDa ^ Hs.77100 ^ NM_002095 ^ 2961                    |  |
| 683877 ^ CDC25B ^ Cell division cycle 25B ^ Hs.153752 ^ NM_021873 ^ 994                                                        |  |
| 773419 ^ ARK5 ^ AMP-activated protein kinase family member 5 ^ Hs.524692 ^ NM_014840 ^ 9891                                    |  |
| 685859 ^ NFKBIE ^ Nuclear factor of kappa light polypeptide gene enhancer in B-cells inhibitor, epsilon ^ Hs.458276 ^ NM_00455 |  |
| 682131 ^ GPX1 ^ Glutathione peroxidase 1 ^ Hs.76686 ^ NM_201397 ^ 2876                                                         |  |
| 854760 ^ COCH ^ Coagulation factor C homolog, cochlin (Limulus polyphemus) ^ Hs.21016 ^ NM_004086 ^ 1690                       |  |
| 688410 ^ PAX4 ^ Paired box gene 4 ^ Hs.129706 ^ NM_006193 ^ 5078                                                               |  |
| 869233 ^ ELK3 ^ ELK3, ETS-domain protein (SRF accessory protein 2) ^ Hs.46523 ^ AW948903 ^ 2004                                |  |
| 854313 ^ SR140 ^ U2-associated SR140 protein ^ Hs.529577 ^ BC040051 ^ 23350                                                    |  |
| 859844 ^ ^ MRNA; cDNA DKFZp686M03111 (from clone DKFZp686M03111) ^ Hs.209973 ^ BX537816 ^                                      |  |
| 867875 ^ GNAZ ^ Guanine nucleotide binding protein (G protein), alpha z polypeptide ^ Hs.526920 ^ NM_002073 ^ 2781             |  |
| 692278 ^ NSBP1 ^ Nucleosomal binding protein 1 ^ Hs.282204 ^ NM_030763 ^ 79366                                                 |  |
| 851459 ^ ACDC ^ Adipocyte, C1Q and collagen domain containing ^ Hs.80485 ^ NM_004797 ^ 9370                                    |  |
| 697855 ^ FOLR1 ^ Folate receptor 1 (adult) ^ Hs.73769 ^ NM_016725 ^ 2348                                                       |  |

| Forearm and Back SAM analysis (FDR < 5.87%)                                                                                   |  |
|-------------------------------------------------------------------------------------------------------------------------------|--|
| 842656 ^ ^ ^ ^ NM_001040077 ^                                                                                                 |  |
| 866997 ^ GTF2E2 ^ General transcription factor IIE, polypeptide 2, beta 34kDa ^ Hs.77100 ^ NM_002095 ^ 2961                   |  |
| 859193 ^ C3 ^ Complement component 3 ^ Hs.529053 ^ NM_000064 ^ 718                                                            |  |
| 693675 ^ DOCK11 ^ Deducator of cytokinesis 11 ^ Hs.368203 ^ NM_144658 ^ 139818                                                |  |
| 691543 ^ ^ ^ ^ NM_001040077 ^                                                                                                 |  |
| 866825 ^ ADAMTS4 ^ A disintegrin-like and metalloprotease (reprolysin type) with thrombospondin type 1 motif, 4 ^ Hs.211604 ^ |  |
| 843793 ^ ^ ^ ^ NR_002196 ^                                                                                                    |  |
| 691834 ^ LOXL2 ^ Lysyl oxidase-like 2 ^ Hs.116479 ^ NM_002318 ^ 4017                                                          |  |
| 843489 ^ THBS4 ^ Thrombospondin 4 ^ Hs.211426 ^ NM_003248 ^ 7060                                                              |  |
| 682131 ^ GPX1 ^ Glutathione peroxidase 1 ^ Hs.76686 ^ NM_201397 ^ 2876                                                        |  |
| 690937 ^ ICAM2 ^ Intercellular adhesion molecule 2 ^ Hs.431460 ^ NM_000873 ^ 3384                                             |  |
| 691907 ^ PCOLCE2 ^ Procollagen C-endopeptidase enhancer 2 ^ Hs.8944 ^ NM_013363 ^ 26577                                       |  |
| 687738 ^ COL4A2 ^ Collagen, type IV, alpha 2 ^ Hs.508716 ^ NM_001846 ^ 1284                                                   |  |
| 684371 ^ CDO1 ^ Cysteine dioxygenase, type I ^ Hs.442378 ^ NM_001801 ^ 1036                                                   |  |
| 865995 ^ EHD2 ^ EH-domain containing 2 ^ Hs.325650 ^ NM_014601 ^ 30846                                                        |  |
| 688198 ^ RASD1 ^ RAS, dexamethasone-induced 1 ^ Hs.25829 ^ NM_016084 ^ 51655                                                  |  |

**Supplementary Data File S2: Genes correlated with change in CD20+ positive B cell**

| <b>Gene Symbol, Description, Acession, LocusLink ID</b>                             |
|-------------------------------------------------------------------------------------|
| LCP1 Lymphocyte cytosolic protein 1 (L-plastin) NM_002298 3936                      |
| PRKCB1 Protein kinase C, beta 1 NM_002738 5579                                      |
| ARK5 AMP-activated protein kinase family member 5 NM_014840 9891                    |
| FLJ10357 Hypothetical protein FLJ10357 NM_018071 55701                              |
| TNFRSF8 Tumor necrosis factor receptor superfamily, member 8 NM_001243 943          |
| RBM14 RNA binding motif protein 14 NM_006328 10432                                  |
| AASDH 2-aminoadipic 6-semialdehyde dehydrogenase BG209258 132949                    |
| C2F C2f protein NM_006331 10436                                                     |
| A_24_P698376                                                                        |
| NDFIP1 Nedd4 family interacting protein 1 NM_030571 80762                           |
| ALOX5 Arachidonate 5-lipoxygenase NM_000698 240                                     |
| KIAA1272 KIAA1272 protein AK026194 57186                                            |
| C3 Complement component 3 NM_000064 718                                             |
| Homo sapiens, clone IMAGE:5299888, mRNA BC039397                                    |
| ENST00000277858                                                                     |
| TUBB Tubulin, beta polypeptide NM_178014 203068                                     |
| LOC126208 Hypothetical protein LOC126208 NM_001002836 126208                        |
| SLA Src-like-adaptor NM_006748 6503                                                 |
| PSARL Presenilin associated, rhomboid-like NM_018622 55486                          |
| MGC11324 Hypothetical protein MGC11324 NM_032717 84803                              |
| NM_016265                                                                           |
| XTP3TPA XTP3-transactivated protein A NM_024096 79077                               |
| RPS6KA3 Ribosomal protein S6 kinase, 90kDa, polypeptide 3 NM_004586 6197            |
| CTSS Cathepsin S NM_004079 1520                                                     |
| ICAM2 Intercellular adhesion molecule 2 NM_000873 3384                              |
| SLC43A1 Solute carrier family 43, member 1 NM_003627 8501                           |
| CD83 CD83 antigen (activated B lymphocytes, immunoglobulin superfamily) NM_004233   |
| SF3A1 Splicing factor 3a, subunit 1, 120kDa NM_005877 10291                         |
| TOR1A Torsin family 1, member A (torsin A) NM_000113 1861                           |
| FLJ10774 N-acetyltransferase-like protein NM_024662 55226                           |
| USP34 Ubiquitin specific protease 34 NM_014709 9736                                 |
| CD33 CD33 antigen (gp67) NM_001772 945                                              |
| MAP1B Microtubule-associated protein 1B CR595522 4131                               |
| KLHL12 Kelch-like 12 (Drosophila) NM_021633 59349                                   |
| BTG1 B-cell translocation gene 1, anti-proliferative NM_001731 694                  |
| FBL Fibrillarin NM_001436 2091                                                      |
| LASS2 LAG1 longevity assurance homolog 2 (S. cerevisiae) NM_181746 29956            |
| CD53 CD53 antigen NM_000560 963                                                     |
| ARHGDI1 Rho GDP dissociation inhibitor (GDI) beta NM_001175 397                     |
| DKFZP547E1010 DKFZP547E1010 protein AF318362 26097                                  |
| TRA16 TR4 orphan receptor associated protein TRA16 NM_176880 126382                 |
| MAP3K14 Mitogen-activated protein kinase kinase 14 NM_003954 9020                   |
| XM_933879                                                                           |
| STOM Stomatin NM_198194 2040                                                        |
| MK2S4 Protein kinase substrate MK2S4 NM_052862 92241                                |
| CCND2 Cyclin D2 NM_001759 894                                                       |
| PSCDBP Pleckstrin homology, Sec7 and coiled-coil domains, binding protein NM_004288 |
| A_24_P75700                                                                         |
| WFS1 Wolfram syndrome 1 (wolframin) NM_006005 7466                                  |
| MGC14327 Hypothetical protein MGC14327 NM_053045 94107                              |

|                                                                                                                                  |
|----------------------------------------------------------------------------------------------------------------------------------|
| LRMP Lymphoid-restricted membrane protein NM_006152 4033                                                                         |
| ANXA11 Annexin A11 NM_145869 311                                                                                                 |
| CWF19L1 CWF19-like 1, cell cycle control (S. pombe) NM_018294 55280                                                              |
| A_24_P627678                                                                                                                     |
| ANGPT1 Angiotensinogen 1 NM_001146 284                                                                                           |
| LDHB Lactate dehydrogenase B NM_002300 3945                                                                                      |
| EPAS1 Endothelial PAS domain protein 1 NM_001430 2034                                                                            |
| COPG Coatamer protein complex, subunit gamma NM_016128 22820                                                                     |
| C12orf2 Chromosome 12 open reading frame 2 AY665468 11228                                                                        |
| SNX3 Sorting nexin 3 NM_003795 8724                                                                                              |
| XRCC5 X-ray repair complementing defective repair in Chinese hamster cells 5 (double-strand break repair protein) NM_005050 4131 |
| NUP93 Nucleoporin 93kDa NM_014669 9688                                                                                           |
| ACSL4 Acyl-CoA synthetase long-chain family member 4 NM_004458 2182                                                              |
| LIF Leukemia inhibitory factor (cholinergic differentiation factor) NM_002309 3976                                               |
| KIAA0870 KIAA0870 protein NM_014957 22898                                                                                        |
| UBADC1 Ubiquitin associated domain containing 1 NM_016172 10422                                                                  |
| FLJ10315 Hypothetical protein FLJ10315 NM_018056 55116                                                                           |
| MAP1B Microtubule-associated protein 1B NM_005909 4131                                                                           |
| DERL1 Der1-like domain family, member 1 NM_024295 79139                                                                          |
| A_24_P161655                                                                                                                     |
| CD97 CD97 antigen NM_078481 976                                                                                                  |
| PTPN13 Protein tyrosine phosphatase, non-receptor type 13 (APO-1/CD95 (Fas)-associated protein 2) NM_005050 4131                 |
| FER1L3 Fer-1-like 3, myoferlin (C. elegans) NM_013451 26509                                                                      |
| STK17B Serine/threonine kinase 17b (apoptosis-inducing) NM_004226 9262                                                           |
| THADA Thyroid adenoma associated NM_022065 63892                                                                                 |
| C14orf123 Chromosome 14 open reading frame 123 NM_014169 29082                                                                   |
| A_23_P255111                                                                                                                     |
| ZNF219 Zinc finger protein 219 NM_016423 51222                                                                                   |
| MGC20481 Hypothetical protein MGC20481 NM_052849 90416                                                                           |
| THC2314239                                                                                                                       |
| CASP10 Caspase 10, apoptosis-related cysteine protease NM_032977 843                                                             |
| TOR3A Torsin family 3, member A NM_022371 64222                                                                                  |
| YLP1 YLP motif containing 1 BC023570 56252                                                                                       |
| ITGB2 Integrin, beta 2 (antigen CD18 (p95), lymphocyte function-associated antigen 1; membrane protein 1) NM_001006634 55114     |
| MYST2 MYST histone acetyltransferase 2 NM_007067 11143                                                                           |
| THC2365158                                                                                                                       |
| VPS18 Vacuolar protein sorting protein 18 NM_020857 57617                                                                        |
| CP Ceruloplasmin (ferroxidase) NM_000096 1356                                                                                    |
| SF3B3 Splicing factor 3b, subunit 3, 130kDa NM_012426 23450                                                                      |
| POLDIP3 Polymerase (DNA-directed), delta interacting protein 3 NM_032311 84271                                                   |
| PRKWNK1 Protein kinase, lysine deficient 1 AB002342 65125                                                                        |
| JAM2 Junctional adhesion molecule 2 NM_021219 58494                                                                              |
| MYO10 Myosin X NM_012334 4651                                                                                                    |
| ARHGAP17 Rho GTPase activating protein 17 NM_001006634 55114                                                                     |
| TPT1 Tumor protein, translationally-controlled 1 NM_003295 7178                                                                  |
| MGLL Monoglyceride lipase NM_007283 11343                                                                                        |
| IGJ Immunoglobulin J polypeptide, linker protein for immunoglobulin alpha and mu polypeptide chain NM_001006634 55114            |
| A_23_P125109                                                                                                                     |
| MTCH1 Mitochondrial carrier homolog 1 (C. elegans) NM_014341 23787                                                               |
| SLC39A1 Solute carrier family 39 (zinc transporter), member 1 NM_014437 27173                                                    |
| NIP30 NEFA-interacting nuclear protein NIP30 NM_024946 80011                                                                     |
| TM7SF3 Transmembrane 7 superfamily member 3 NM_016551 51768                                                                      |

|                                                                           |
|---------------------------------------------------------------------------|
| HLA-F Major histocompatibility complex, class I, F NM_018950 3134         |
| ENST00000383620                                                           |
| PDE2A Phosphodiesterase 2A, cGMP-stimulated NM_002599 5138                |
| LTB Lymphotoxin beta (TNF superfamily, member 3) NM_002341 4050           |
| CCND1 Cyclin D1 (PRAD1: parathyroid adenomatosis 1) NM_053056 595         |
| RPL7A Ribosomal protein L7a NM_000972 6130                                |
| ZFP36 Zinc finger protein 36, C3H type, homolog (mouse) NM_003407 7538    |
| A_24_P118422                                                              |
| PRCP Prolylcarboxypeptidase (angiotensinase C) NM_199418 5547             |
| POLR3B Polymerase (RNA) III (DNA directed) polypeptide B NM_018082 55703  |
| TPM3 Tropomyosin 3 NM_153649 7170                                         |
| PSCD4 Pleckstrin homology, Sec7 and coiled-coil domains 4 NM_013385 27128 |
| KIAA1787 G protein pathway suppressor 2 NM_004489 84461                   |
| A_24_P264597                                                              |
| UXT Ubiquitously-expressed transcript NM_004182 8409                      |
| PRDX1 Peroxiredoxin 1 NM_002574 5052                                      |
| LOC126295 Hypothetical protein LOC126295 NM_173480 126295                 |

**s found in Immunohistochem****CD20 Skin Correlation**

|             |
|-------------|
| 0.742629542 |
| 0.668818617 |
| 0.660770446 |
| 0.656611358 |
| 0.646395674 |
| 0.640118651 |
| 0.630398781 |
| 0.621347496 |
| 0.603892546 |
| 0.603876771 |
| 0.602961839 |
| 0.602262961 |
| 0.601813065 |
| 0.599098543 |
| 0.595629176 |
| 0.593405906 |
| 0.590504429 |
| 0.589385722 |
| 0.586555164 |
| 0.583759312 |
| 0.581672004 |
| 0.581234648 |
| 0.576526426 |
| 0.576249283 |
| 0.575816175 |
| 0.575110406 |
| 0.575051981 |
| 0.574437925 |
| 0.574237847 |
| 0.573200305 |
| 0.565794017 |
| 0.56565121  |
| 0.561849228 |
| 0.560314263 |
| 0.559631735 |
| 0.559454772 |
| 0.558244029 |
| 0.554642413 |
| 0.552780418 |
| 0.552725423 |
| 0.552293051 |
| 0.551894419 |
| 0.551756888 |
| 0.549695154 |
| 0.549284927 |
| 0.548993292 |
| 0.548443302 |
| 0.547769108 |
| 0.547363592 |
| 0.545243182 |

|             |
|-------------|
| 0.542111791 |
| 0.542029594 |
| 0.541652017 |
| 0.540394247 |
| 0.539899046 |
| 0.539791471 |
| 0.539372628 |
| 0.537285623 |
| 0.536944695 |
| 0.536651194 |
| 0.536109456 |
| 0.535120163 |
| 0.534778556 |
| 0.534293743 |
| 0.533883632 |
| 0.533740244 |
| 0.529871234 |
| 0.529688842 |
| 0.529473878 |
| 0.529167054 |
| 0.528614972 |
| 0.527497416 |
| 0.527443734 |
| 0.527165153 |
| 0.526862439 |
| 0.526714141 |
| 0.525648114 |
| 0.525604697 |
| 0.525069896 |
| 0.524083116 |
| 0.52161047  |
| 0.520734532 |
| 0.52012431  |
| 0.51934293  |
| 0.518394165 |
| 0.517436469 |
| 0.515479635 |
| 0.515427824 |
| 0.514281934 |
| 0.513747155 |
| 0.513622899 |
| 0.512675877 |
| 0.511865529 |
| 0.510032339 |
| 0.509414047 |
| 0.509334303 |
| 0.508967776 |
| 0.50883488  |
| 0.507822795 |
| 0.507382977 |
| 0.507303306 |
| 0.507093191 |



|             |
|-------------|
| 0.506992465 |
| 0.50622238  |
| 0.505158885 |
| 0.504981369 |
| 0.504798738 |
| 0.504648555 |
| 0.50436297  |
| 0.504007049 |
| 0.503953898 |
| 0.50391122  |
| 0.503375808 |
| 0.50259553  |
| 0.502543376 |
| 0.500563502 |
| 0.500440344 |
| 0.500435368 |
| 0.500361059 |

**ical Analysis of Skin biopsies**

**Supplementary Figure S3: Gene Ontology Biological processes associated with genes in dSSc subsets**

| Category      | Term                                             | Count | %      | PValue   |
|---------------|--------------------------------------------------|-------|--------|----------|
| GOTERM_BP_ALL | GO:0044255~cellular lipid metabolic process      | 38    | 14.07% | 9.70E-14 |
| GOTERM_BP_ALL | GO:0006629~lipid metabolic process               | 41    | 15.19% | 4.81E-13 |
| GOTERM_BP_ALL | GO:0032787~monocarboxylic acid metabolic process | 23    | 8.52%  | 4.92E-12 |
| GOTERM_BP_ALL | GO:0019752~carboxylic acid metabolic process     | 33    | 12.22% | 2.54E-11 |
| GOTERM_BP_ALL | GO:0006082~organic acid metabolic process        | 33    | 12.22% | 2.91E-11 |
| GOTERM_BP_ALL | GO:0006631~fatty acid metabolic process          | 19    | 7.04%  | 5.27E-11 |
|               |                                                  |       |        |          |
| Category      | Term                                             | Count | %      | PValue   |
| GOTERM_BP_ALL | GO:0016125~sterol metabolic process              | 11    | 4.07%  | 3.99E-07 |
| GOTERM_BP_ALL | GO:0008203~cholesterol metabolic process         | 10    | 3.70%  | 1.19E-06 |
| GOTERM_BP_ALL | GO:0016126~sterol biosynthetic process           | 7     | 2.59%  | 7.17E-06 |
| GOTERM_BP_ALL | GO:0006695~cholesterol biosynthetic process      | 6     | 2.22%  | 2.78E-05 |
| GOTERM_BP_ALL | GO:0008202~steroid metabolic process             | 12    | 4.44%  | 7.18E-05 |
| GOTERM_BP_ALL | GO:0006694~steroid biosynthetic process          | 8     | 2.96%  | 1.84E-04 |
|               |                                                  |       |        |          |
| Category      | Term                                             | Count | %      | PValue   |
| GOTERM_BP_ALL | GO:0006066~alcohol metabolic process             | 21    | 7.78%  | 3.18E-08 |

| Genes     | List Total | Pop Hits | Pop Total | Fold Enric | Benjamini |
|-----------|------------|----------|-----------|------------|-----------|
| FADS1, H  | 218        | 624      | 15360     | 4.290755   | 5.09E-10  |
| ACAT2, F  | 218        | 764      | 15360     | 3.781161   | 1.26E-09  |
| GPT, FAD  | 218        | 244      | 15360     | 6.6416     | 8.62E-09  |
| FADS1, S  | 218        | 572      | 15360     | 4.064926   | 3.33E-08  |
| FADS1, S  | 218        | 575      | 15360     | 4.043718   | 3.06E-08  |
| FADS1, S  | 218        | 175      | 15360     | 7.649803   | 4.61E-08  |
|           |            |          |           |            |           |
| Genes     | List Total | Pop Hits | Pop Total | Fold Enric | Benjamini |
| INSIG1, H | 218        | 87       | 15360     | 8.908573   | 2.33E-04  |
| INSIG1, H | 218        | 76       | 15360     | 9.270884   | 6.26E-04  |
| HMGCS1,   | 218        | 34       | 15360     | 14.50621   | 0.003419  |
| HMGCS1,   | 218        | 26       | 15360     | 16.2597    | 0.012078  |
| INSIG1, H | 218        | 187      | 15360     | 4.521415   | 0.026596  |
| HMGCS1,   | 218        | 84       | 15360     | 6.710354   | 0.062345  |
|           |            |          |           |            |           |
| Genes     | List Total | Pop Hits | Pop Total | Fold Enric | Benjamini |
| GPT, PPA  | 218        | 322      | 15360     | 4.595134   | 2.39E-05  |

| Category      | Term                                                            | Count |
|---------------|-----------------------------------------------------------------|-------|
| GOTERM_BP_ALL | GO:0007067~mitosis                                              | 28    |
| GOTERM_BP_ALL | GO:0000087~M phase of mitotic cell cycle                        | 28    |
| GOTERM_BP_ALL | GO:0000279~M phase                                              | 29    |
| GOTERM_BP_ALL | GO:0000278~mitotic cell cycle                                   | 28    |
| GOTERM_BP_ALL | GO:0022403~cell cycle phase                                     | 29    |
| GOTERM_BP_ALL | GO:0051301~cell division                                        | 24    |
| GOTERM_BP_ALL | GO:0007049~cell cycle                                           | 38    |
| GOTERM_BP_ALL | GO:0022402~cell cycle process                                   | 34    |
| GOTERM_BP_ALL | GO:0000074~regulation of progression through cell cycle         | 16    |
| GOTERM_BP_ALL | GO:0051726~regulation of cell cycle                             | 16    |
|               |                                                                 |       |
| Category      | Term                                                            | Count |
| GOTERM_BP_ALL | GO:0007017~microtubule-based process                            | 11    |
| GOTERM_BP_ALL | GO:0006996~organelle organization and biogenesis                | 24    |
| GOTERM_BP_ALL | GO:0007010~cytoskeleton organization and biogenesis             | 15    |
|               |                                                                 |       |
| Category      | Term                                                            | Count |
| GOTERM_BP_ALL | GO:0000226~microtubule cytoskeleton organization and biogenesis | 8     |
| GOTERM_BP_ALL | GO:0007017~microtubule-based process                            | 11    |
| GOTERM_BP_ALL | GO:0007051~spindle organization and biogenesis                  | 5     |
|               |                                                                 |       |
| Category      | Term                                                            | Count |
| GOTERM_BP_ALL | GO:0007059~chromosome segregation                               | 8     |
| GOTERM_BP_ALL | GO:0051303~establishment of chromosome localization             | 4     |
| GOTERM_BP_ALL | GO:0050000~chromosome localization                              | 4     |
| GOTERM_BP_ALL | GO:0000070~mitotic sister chromatid segregation                 | 5     |
| GOTERM_BP_ALL | GO:0000819~sister chromatid segregation                         | 5     |
| GOTERM_BP_ALL | GO:0051276~chromosome organization and biogenesis               | 12    |
| GOTERM_BP_ALL | GO:0051310~metaphase plate congression                          | 3     |
|               |                                                                 |       |
| Category      | Term                                                            | Count |
| GOTERM_BP_ALL | GO:0006974~response to DNA damage stimulus                      | 12    |
| GOTERM_BP_ALL | GO:0009719~response to endogenous stimulus                      | 13    |
| GOTERM_BP_ALL | GO:0006259~DNA metabolic process                                | 19    |
|               |                                                                 |       |
| Category      | Term                                                            | Count |
| GOTERM_BP_ALL | GO:0007088~regulation of mitosis                                | 6     |

|        |          |                                                                           |
|--------|----------|---------------------------------------------------------------------------|
| %      | PValue   | Genes                                                                     |
| 19.18% | 1.63E-25 | PLK1, CDCA8, CDC2, CEP55, PBK, CENPF, TPX2, ASPM, CENPE, SPC25, CDC20, M  |
| 19.18% | 2.08E-25 | PLK1, CDCA8, CDC2, CEP55, PBK, CENPF, TPX2, ASPM, CENPE, SPC25, CDC20, M  |
| 19.86% | 4.89E-24 | PLK1, CDCA8, RAD54B, CDC2, CEP55, PBK, CENPF, TPX2, ASPM, CENPE, SPC25,   |
| 19.18% | 1.41E-21 | PLK1, CDCA8, CDC2, CEP55, PBK, CENPF, TPX2, ASPM, CENPE, SPC25, CDC20, M  |
| 19.86% | 1.81E-21 | PLK1, CDCA8, RAD54B, CDC2, CEP55, PBK, CENPF, TPX2, ASPM, CENPE, SPC25,   |
| 16.44% | 2.03E-19 | CDCA8, CDC2, WEE1, CEP55, ANLN, CCNA2, NUF2, CENPF, ASPM, CENPJ, KIF11,   |
| 26.03% | 7.53E-19 | PLK1, RAD54B, CDCA8, CDC2, MAP2K6, MYBL2, CEP55, PBK, TPX2, CENPF, ASPM   |
| 23.29% | 1.48E-17 | PLK1, CDCA8, RAD54B, CDC2, MAP2K6, MYBL2, CEP55, PBK, TPX2, CENPF, ASPM   |
| 10.96% | 6.30E-06 | PLK1, CDC45L, MAP2K6, CDC2, MYBL2, WEE1, ANLN, DLG7, CCNA2, CENPF, BRO    |
| 10.96% | 6.75E-06 | PLK1, CDC45L, MAP2K6, CDC2, MYBL2, WEE1, ANLN, DLG7, CCNA2, CENPF, BRO    |
|        |          |                                                                           |
| %      | PValue   | Genes                                                                     |
| 7.53%  | 4.69E-06 | KIF2C, KIF11, CENPJ, CENPE, BRCA1, KIF20A, SPAG5, NDC80, UBE2C, CTTNBP2,  |
| 16.44% | 1.40E-05 | NEFH, EP400, BLM, KIF20A, ANK1, ANLN, DLG7, HCG_2029577, PTTG2, KIF2C, CE |
| 10.27% | 2.83E-05 | NEFH, ANK1, KIF20A, ANLN, HCG_2029577, KIF2C, CENPJ, KIF11, CENPE, BRCA1, |
|        |          |                                                                           |
| %      | PValue   | Genes                                                                     |
| 5.48%  | 2.39E-06 | KIF2C, KIF11, CENPJ, SPAG5, NDC80, UBE2C, CTTNBP2, AURKA,                 |
| 7.53%  | 4.69E-06 | KIF2C, KIF11, CENPJ, CENPE, BRCA1, KIF20A, SPAG5, NDC80, UBE2C, CTTNBP2,  |
| 3.42%  | 1.19E-05 | KIF11, SPAG5, NDC80, UBE2C, AURKA,                                        |
|        |          |                                                                           |
| %      | PValue   | Genes                                                                     |
| 5.48%  | 3.58E-07 | CENPF, CENPE, BRCA1, DLG7, NDC80, NCAPG, CDCA5, NUF2,                     |
| 2.74%  | 7.43E-06 | CENPF, CENPE, DLG7, CDCA5,                                                |
| 2.74%  | 7.43E-06 | CENPF, CENPE, DLG7, CDCA5,                                                |
| 3.42%  | 7.24E-05 | CENPE, DLG7, NDC80, NCAPG, CDCA5,                                         |
| 3.42%  | 8.23E-05 | CENPE, DLG7, NDC80, NCAPG, CDCA5,                                         |
| 8.22%  | 1.42E-04 | CENPF, NEFH, EP400, CENPE, BLM, CHAF1B, DLG7, NDC80, GSG2, NCAPG, CDC,    |
| 2.05%  | 3.13E-04 | CENPF, CENPE, CDCA5,                                                      |
|        |          |                                                                           |
| %      | PValue   | Genes                                                                     |
| 8.22%  | 2.45E-05 | RAD54B, UHRF1, BLM, CHAF1B, CDC2, MAP2K6, BRCA1, TYMS, DTL, FANCI, CCN    |
| 8.90%  | 3.75E-05 | UHRF1, RAD54B, BLM, MAP2K6, CDC2, CCNA2, CHAF1B, BRCA1, DTL, TYMS, FAN    |
| 13.01% | 4.76E-05 | CDC45L, RAD54B, UHRF1, NEFH, EP400, BLM, ORC6L, PTTG2, TK1, DNMT3B, DNI   |
|        |          |                                                                           |
| %      | PValue   | Genes                                                                     |
| 4.11%  | 1.56E-04 | CENPF, CDC2, ANLN, DLG7, UBE2C, CCNA2,                                    |

|            |          |           |                 |           |
|------------|----------|-----------|-----------------|-----------|
| List Total | Pop Hits | Pop Total | Fold Enrichment | Benjamini |
| 113        | 227      | 15360     | 16.7666         | 8.59E-22  |
| 113        | 229      | 15360     | 16.62016        | 5.46E-22  |
| 113        | 287      | 15360     | 13.73501        | 8.56E-21  |
| 113        | 318      | 15360     | 11.96861        | 1.85E-18  |
| 113        | 356      | 15360     | 11.07288        | 1.91E-18  |
| 113        | 245      | 15360     | 13.31551        | 1.78E-16  |
| 113        | 894      | 15360     | 5.777751        | 5.65E-16  |
| 113        | 749      | 15360     | 6.170351        | 9.73E-15  |
| 113        | 526      | 15360     | 4.134729        | 0.002755  |
| 113        | 529      | 15360     | 4.11128         | 0.002723  |
|            |          |           |                 |           |
| List Total | Pop Hits | Pop Total | Fold Enrichment | Benjamini |
| 113        | 220      | 15360     | 6.79646         | 0.002238  |
| 113        | 1195     | 15360     | 2.729959        | 0.004324  |
| 113        | 526      | 15360     | 3.876308        | 0.007802  |
|            |          |           |                 |           |
| List Total | Pop Hits | Pop Total | Fold Enrichment | Benjamini |
| 113        | 83       | 15360     | 13.10161        | 0.001253  |
| 113        | 220      | 15360     | 6.79646         | 0.002238  |
| 113        | 20       | 15360     | 33.9823         | 0.003887  |
|            |          |           |                 |           |
| List Total | Pop Hits | Pop Total | Fold Enrichment | Benjamini |
| 113        | 63       | 15360     | 17.26085        | 2.09E-04  |
| 113        | 6        | 15360     | 90.61947        | 0.002599  |
| 113        | 6        | 15360     | 90.61947        | 0.002599  |
| 113        | 31       | 15360     | 21.92407        | 0.017144  |
| 113        | 32       | 15360     | 21.23894        | 0.018623  |
| 113        | 394      | 15360     | 4.139976        | 0.030583  |
| 113        | 4        | 15360     | 101.9469        | 0.061333  |
|            |          |           |                 |           |
| List Total | Pop Hits | Pop Total | Fold Enrichment | Benjamini |
| 113        | 324      | 15360     | 5.034415        | 0.007117  |
| 113        | 403      | 15360     | 4.384813        | 0.009798  |
| 113        | 860      | 15360     | 3.003087        | 0.011847  |
|            |          |           |                 |           |
| List Total | Pop Hits | Pop Total | Fold Enrichment | Benjamini |
| 113        | 70       | 15360     | 11.65107        | 0.032335  |

| Functional Group 1 |                                                            |       |        |          |
|--------------------|------------------------------------------------------------|-------|--------|----------|
| Category           | Term                                                       | Count | %      | PValue   |
| GOTERM_BP_ALL      | GO:0002376~immune system process                           | 72    | 14.26% | 6.65E-11 |
| GOTERM_BP_ALL      | GO:0006955~immune response                                 | 59    | 11.68% | 2.82E-09 |
| GOTERM_BP_ALL      | GO:0050896~response to stimulus                            | 128   | 25.35% | 1.38E-07 |
| Functional Group 2 |                                                            |       |        |          |
| Category           | Term                                                       | Count | %      | PValue   |
| GOTERM_BP_ALL      | GO:0009611~response to wounding                            | 39    | 7.72%  | 1.51E-10 |
| GOTERM_BP_ALL      | GO:0006950~response to stress                              | 66    | 13.07% | 8.39E-10 |
| GOTERM_BP_ALL      | GO:0009605~response to external stimulus                   | 46    | 9.11%  | 5.40E-09 |
| GOTERM_BP_ALL      | GO:0006952~defense response                                | 41    | 8.12%  | 5.03E-08 |
| GOTERM_BP_ALL      | GO:0006954~inflammatory response                           | 28    | 5.54%  | 5.25E-08 |
| Functional Group 3 |                                                            |       |        |          |
| Category           | Term                                                       | Count | %      | PValue   |
| GOTERM_BP_ALL      | GO:0032502~developmental process                           | 143   | 28.32% | 4.87E-10 |
| GOTERM_BP_ALL      | GO:0048513~organ development                               | 62    | 12.28% | 9.94E-06 |
| GOTERM_BP_ALL      | GO:0007275~multicellular organismal development            | 97    | 19.21% | 1.50E-05 |
| GOTERM_BP_ALL      | GO:0048856~anatomical structure development                | 90    | 17.82% | 2.16E-05 |
| GOTERM_BP_ALL      | GO:0048731~system development                              | 73    | 14.46% | 2.24E-04 |
| GOTERM_BP_ALL      | GO:0032501~multicellular organismal process                | 122   | 24.16% | 0.016569 |
| Category           | Term                                                       | Count | %      | PValue   |
| GOTERM_BP_ALL      | GO:0006915~apoptosis                                       | 48    | 9.50%  | 2.61E-07 |
| GOTERM_BP_ALL      | GO:0012501~programmed cell death                           | 48    | 9.50%  | 3.39E-07 |
| GOTERM_BP_ALL      | GO:0008219~cell death                                      | 48    | 9.50%  | 1.50E-06 |
| GOTERM_BP_ALL      | GO:0016265~death                                           | 48    | 9.50%  | 1.50E-06 |
| GOTERM_BP_ALL      | GO:0048468~cell development                                | 62    | 12.28% | 3.96E-06 |
| GOTERM_BP_ALL      | GO:0042981~regulation of apoptosis                         | 35    | 6.93%  | 4.20E-06 |
| GOTERM_BP_ALL      | GO:0043067~regulation of programmed cell death             | 35    | 6.93%  | 5.31E-06 |
| GOTERM_BP_ALL      | GO:0048869~cellular developmental process                  | 78    | 15.45% | 5.45E-05 |
| GOTERM_BP_ALL      | GO:0030154~cell differentiation                            | 78    | 15.45% | 5.45E-05 |
| Category           | Term                                                       | Count | %      | PValue   |
| GOTERM_BP_ALL      | GO:0006928~cell motility                                   | 30    | 5.94%  | 4.23E-06 |
| GOTERM_BP_ALL      | GO:0051674~localization of cell                            | 30    | 5.94%  | 4.23E-06 |
| GOTERM_BP_ALL      | GO:0016477~cell migration                                  | 18    | 3.56%  | 0.001185 |
| Category           | Term                                                       | Count | %      | PValue   |
| GOTERM_BP_ALL      | GO:0006817~phosphate transport                             | 16    | 3.17%  | 3.17E-08 |
| GOTERM_BP_ALL      | GO:0015698~inorganic anion transport                       | 17    | 3.37%  | 8.48E-06 |
| GOTERM_BP_ALL      | GO:0006820~anion transport                                 | 17    | 3.37%  | 1.00E-04 |
| Category           | Term                                                       | Count | %      | PValue   |
| GOTERM_BP_ALL      | GO:0007243~protein kinase cascade                          | 29    | 5.74%  | 3.27E-06 |
| GOTERM_BP_ALL      | GO:0009966~regulation of signal transduction               | 34    | 6.73%  | 3.89E-05 |
| GOTERM_BP_ALL      | GO:0009967~positive regulation of signal transduction      | 15    | 2.97%  | 7.18E-05 |
| GOTERM_BP_ALL      | GO:0007249~I-kappaB kinase/NF-kappaB cascade               | 14    | 2.77%  | 8.93E-05 |
| GOTERM_BP_ALL      | GO:0043123~positive regulation of I-kappaB kinase activity | 11    | 2.18%  | 2.47E-04 |
| GOTERM_BP_ALL      | GO:0043122~regulation of I-kappaB kinase activity          | 11    | 2.18%  | 4.77E-04 |
| Category           | Term                                                       | Count | %      | PValue   |
| GOTERM_BP_ALL      | GO:0001944~vasculature development                         | 19    | 3.76%  | 4.55E-06 |



|               |                                             |       |        |          |
|---------------|---------------------------------------------|-------|--------|----------|
| GOTERM_BP_ALL | GO:0048514~blood vessel morphogenesis       | 17    | 3.37%  | 1.16E-05 |
| GOTERM_BP_ALL | GO:0001568~blood vessel development         | 18    | 3.56%  | 1.44E-05 |
| GOTERM_BP_ALL | GO:0001525~angiogenesis                     | 15    | 2.97%  | 3.41E-05 |
| GOTERM_BP_ALL | GO:0048646~anatomical structure formation   | 16    | 3.17%  | 1.09E-04 |
| GOTERM_BP_ALL | GO:0009887~organ morphogenesis              | 24    | 4.75%  | 9.77E-04 |
|               |                                             |       |        |          |
| Category      | Term                                        | Count | %      | PValue   |
| GOTERM_BP_ALL | GO:0042981~regulation of apoptosis          | 35    | 6.93%  | 4.20E-06 |
| GOTERM_BP_ALL | GO:0043067~regulation of programmed cell    | 35    | 6.93%  | 5.31E-06 |
|               |                                             |       |        |          |
| Category      | Term                                        | Count | %      | PValue   |
| GOTERM_BP_ALL | GO:0009607~response to biotic stimulus      | 22    | 4.36%  | 1.32E-04 |
| GOTERM_BP_ALL | GO:0009615~response to virus                | 11    | 2.18%  | 3.47E-04 |
|               |                                             |       |        |          |
| Category      | Term                                        | Count | %      | PValue   |
| GOTERM_BP_ALL | GO:0065007~biological regulation            | 176   | 34.85% | 3.69E-04 |
|               |                                             |       |        |          |
| Category      | Term                                        | Count | %      | PValue   |
| GOTERM_BP_ALL | GO:0006959~humoral immune response          | 11    | 2.18%  | 2.58E-05 |
| GOTERM_BP_ALL | GO:0002541~activation of plasma proteins d  | 7     | 1.39%  | 3.17E-04 |
| GOTERM_BP_ALL | GO:0006956~complement activation            | 7     | 1.39%  | 3.17E-04 |
| GOTERM_BP_ALL | GO:0002526~acute inflammatory response      | 9     | 1.78%  | 9.35E-04 |
| GOTERM_BP_ALL | GO:0002455~humoral immune response me       | 6     | 1.19%  | 9.88E-04 |
| GOTERM_BP_ALL | GO:0002252~immune effector process          | 11    | 2.18%  | 9.89E-04 |
|               |                                             |       |        |          |
| Category      | Term                                        | Count | %      | PValue   |
| GOTERM_BP_ALL | GO:0030198~extracellular matrix organizatio | 8     | 1.58%  | 7.50E-04 |
|               |                                             |       |        |          |
| Category      | Term                                        | Count | %      | PValue   |
| GOTERM_BP_ALL | GO:0042771~DNA damage response, signal      | 4     | 0.79%  | 6.36E-04 |
|               |                                             |       |        |          |
| Category      | Term                                        | Count | %      | PValue   |
| GOTERM_BP_ALL | GO:0007242~intracellular signaling cascade  | 61    | 12.08% | 0.001232 |

| Genes                                              | List Total | Pop Hits | Pop Total | Fold Enrich | Benjamini |
|----------------------------------------------------|------------|----------|-----------|-------------|-----------|
| PXDN, IFIT1, IFITM2, HLA-A, PURB, MR1, MLF1, BPV   | 417        | 1165     | 15360     | 2.276469    | 3.49E-07  |
| PXDN, IFIT1, IFITM2, HLA-A, MR1, IFITM1, HLA-G, IL | 417        | 938      | 15360     | 2.316884    | 2.96E-06  |
| SERP1, IFIT1, CMTM3, IFITM2, HLA-A, HSPA5, MR1     | 417        | 3066     | 15360     | 1.537776    | 7.25E-05  |
| Genes                                              | List Total | Pop Hits | Pop Total | Fold Enrich | Benjamini |
| PRKCA, APOL2, NMI, PROCR, IRF7, PLSCR1, FGF7       | 417        | 431      | 15360     | 3.333055    | 3.96E-07  |
| SERP1, PXDN, SMC6, MUS81, HSPA5, APOL2, LOC        | 417        | 1081     | 15360     | 2.248917    | 1.10E-06  |
| CMTM3, PRKCA, APOL2, NMI, PROCR, IRF7, PLSCR       | 417        | 644      | 15360     | 2.631038    | 4.73E-06  |
| PRKCA, APOL2, NMI, PROCR, TAP1, IRF7, HLA-G, IL    | 417        | 577      | 15360     | 2.617358    | 3.30E-05  |
| PRKCA, NMI, APOL2, PROCR, IRF7, C3, B4GALT1, F     | 417        | 301      | 15360     | 3.426468    | 3.07E-05  |
| Genes                                              | List Total | Pop Hits | Pop Total | Fold Enrich | Benjamini |
| IGFBP7, FEZ2, SOCS3, PERP, HSPA5, PURB, VCAN       | 417        | 3262     | 15360     | 1.614757    | 8.53E-07  |
| CASP7, PURB, MLF1, ODC1, SRGN, BPGM, COL6A3        | 417        | 1282     | 15360     | 1.781389    | 0.002007  |
| FEZ2, PURB, MLF1, VCAN, SFRP2, CDH13, NRP1, H      | 417        | 2349     | 15360     | 1.521051    | 0.002541  |
| IGFBP7, FEZ2, SOCS3, PURB, CASP7, MLF1, ODC1       | 417        | 2153     | 15360     | 1.539762    | 0.003536  |
| FEZ2, PURB, CASP7, MLF1, ODC1, SRGN, BPGM, C       | 417        | 1760     | 15360     | 1.527796    | 0.025762  |
| FEZ2, PURB, MLF1, VCAN, SFRP2, CDH13, NRP1, H      | 417        | 3759     | 15360     | 1.195481    | 0.530809  |
| Genes                                              | List Total | Pop Hits | Pop Total | Fold Enrich | Benjamini |
| DYRK2, SOCS3, CARD6, BIRC3, PIM1, PRKCA, SUL       | 417        | 784      | 15360     | 2.255175    | 1.14E-04  |
| DYRK2, SOCS3, CARD6, BIRC3, PIM1, PRKCA, SUL       | 417        | 791      | 15360     | 2.235218    | 1.37E-04  |
| DYRK2, SOCS3, CARD6, BIRC3, PIM1, PRKCA, SUL       | 417        | 834      | 15360     | 2.119973    | 5.26E-04  |
| DYRK2, SOCS3, CARD6, BIRC3, PIM1, PRKCA, SUL       | 417        | 834      | 15360     | 2.119973    | 5.26E-04  |
| FEZ2, SOCS3, SULF1, HSPA5, DRAM, PERP, CASP        | 417        | 1245     | 15360     | 1.83433     | 0.001094  |
| DYRK2, CARD6, SOCS3, BIRC3, PIM1, PRKCA, HSP       | 417        | 538      | 15360     | 2.396299    | 0.001102  |
| DYRK2, CARD6, SOCS3, BIRC3, PIM1, PRKCA, HSP       | 417        | 544      | 15360     | 2.369869    | 0.001161  |
| FEZ2, SOCS3, SULF1, PERP, DRAM, HSPA5, PURB        | 417        | 1835     | 15360     | 1.565719    | 0.007501  |
| FEZ2, SOCS3, SULF1, PERP, DRAM, HSPA5, PURB        | 417        | 1835     | 15360     | 1.565719    | 0.007501  |
| Genes                                              | List Total | Pop Hits | Pop Total | Fold Enrich | Benjamini |
| FEZ2, PRKCA, CENTD2, ARPC1B, LAMC1, B4GALT         | 417        | 421      | 15360     | 2.624789    | 0.001057  |
| FEZ2, PRKCA, CENTD2, ARPC1B, LAMC1, B4GALT         | 417        | 421      | 15360     | 2.624789    | 0.001057  |
| VAV2, LAMB1, FEZ2, SPON2, TNFRSF12A, PRKCA,        | 417        | 271      | 15360     | 2.446574    | 0.097107  |
| Genes                                              | List Total | Pop Hits | Pop Total | Fold Enrich | Benjamini |
| C1QTNF5, COL15A1, COL6A1, COL4A2, COL6A3, C        | 417        | 94       | 15360     | 6.269708    | 2.38E-05  |
| C1QTNF5, COL15A1, COL6A1, COL4A2, COL6A3, C        | 417        | 162      | 15360     | 3.865352    | 0.00178   |
| C1QTNF5, COL15A1, COL6A1, COL4A2, COL6A3, C        | 417        | 198      | 15360     | 3.162561    | 0.01274   |
| Genes                                              | List Total | Pop Hits | Pop Total | Fold Enrich | Benjamini |
| SOCS3, PRKCA, NMI, WNT5A, ECOP, TGFB3, STAT        | 417        | 393      | 15360     | 2.71807     | 9.55E-04  |
| SOCS3, RGS20, PRKCA, TBC1D1, CENTD2, HTRA1         | 417        | 573      | 15360     | 2.185644    | 0.005663  |
| LGALS9, CASP1, TNFSF10, TWSG1, SYK, ECOP, C        | 417        | 153      | 15360     | 3.611229    | 0.009629  |
| LGALS9, CASP1, TNFSF10, ECOP, STAT1, SECTM1        | 417        | 137      | 15360     | 3.764113    | 0.011659  |
| LGALS9, SECTM1, BST2, TNFRSF1A, CASP1, TNFS        | 417        | 95       | 15360     | 4.265051    | 0.027869  |
| LGALS9, SECTM1, BST2, TNFRSF1A, CASP1, TNFS        | 417        | 103      | 15360     | 3.933785    | 0.047063  |
| Genes                                              | List Total | Pop Hits | Pop Total | Fold Enrich | Benjamini |
| HEY1, TNFRSF12A, PML, COL15A1, COL4A2, RUNX        | 417        | 191      | 15360     | 3.664168    | 0.00104   |
